# Supplementary material for: Multiscale Coupling of an Agent-Based Model of Tissue Fibrosis and a Logic-Based Model of Intracellular Signaling
Source: PubMed Central journal article supplement (PMC6928129; doi:10.3389/fphys.2019.01481), 2019-12-17
Supplement: Data_Sheet_1.pdf [file Data_Sheet_1.pdf]

## *Supplementary Material*

### **Supplementary Figure Legends**

**Supplementary Figure 1. proMMP 1 expression is a combination of multiple upstream inputs.** Activation patterns of network intermediates (A) NF- $\kappa$ B, (B) Smad3, and (C) AP1. (D) proMMP 1 network node activity level (E) A simplified network model representation of the immediate upstream reactions that regulate proMMP 1 expression.

**Supplementary Figure 2. Coupled model produces stochastic results.** Three representative images of the collagen profile at 6 weeks for simulations with migration speeds of 1 grid/10 hrs (A-C), 1 grid/hr (D-E), and 10 grids/hr (G-I).

### **Supplementary Video Legends**

**Supplementary Video 1. Tracking network state of individual fibroblast (from Fig. 8A).** The complete network state (91 nodes) at each time step (1 hour) for the individual fibroblast tracked in Figure 8A and B.

**Supplementary Video 2. Tracking network state of individual fibroblast (from Fig. 8C).** The complete network state (91 nodes) at each time step (1 hour) for the individual fibroblast tracked in Figure 8C and D.

### **Supplementary Table Legends**

**Supplementary Table 1.** Experimental and simulated data corresponding to Figure 10.
